# Supplementary material
Source: Elsevier journal article supplement (https://rcastoragev2.blob.core.windows.net/0e8f977f141897ac25d349427c0ccee8/mmc1.pdf)
Supplement: mmc1 [file mmc1.pdf]

**Molecular Cell, Volume 64**

**Supplemental Information**

**Quorum Sensing Controls Adaptive Immunity  
through the Regulation  
of Multiple CRISPR-Cas Systems**

**Adrian G. Patterson, Simon A. Jackson, Corinda Taylor, Gary B. Evans, George P.C. Salmond, Rita Przybilski, Raymond H.J. Staals, and Peter C. Fineran**

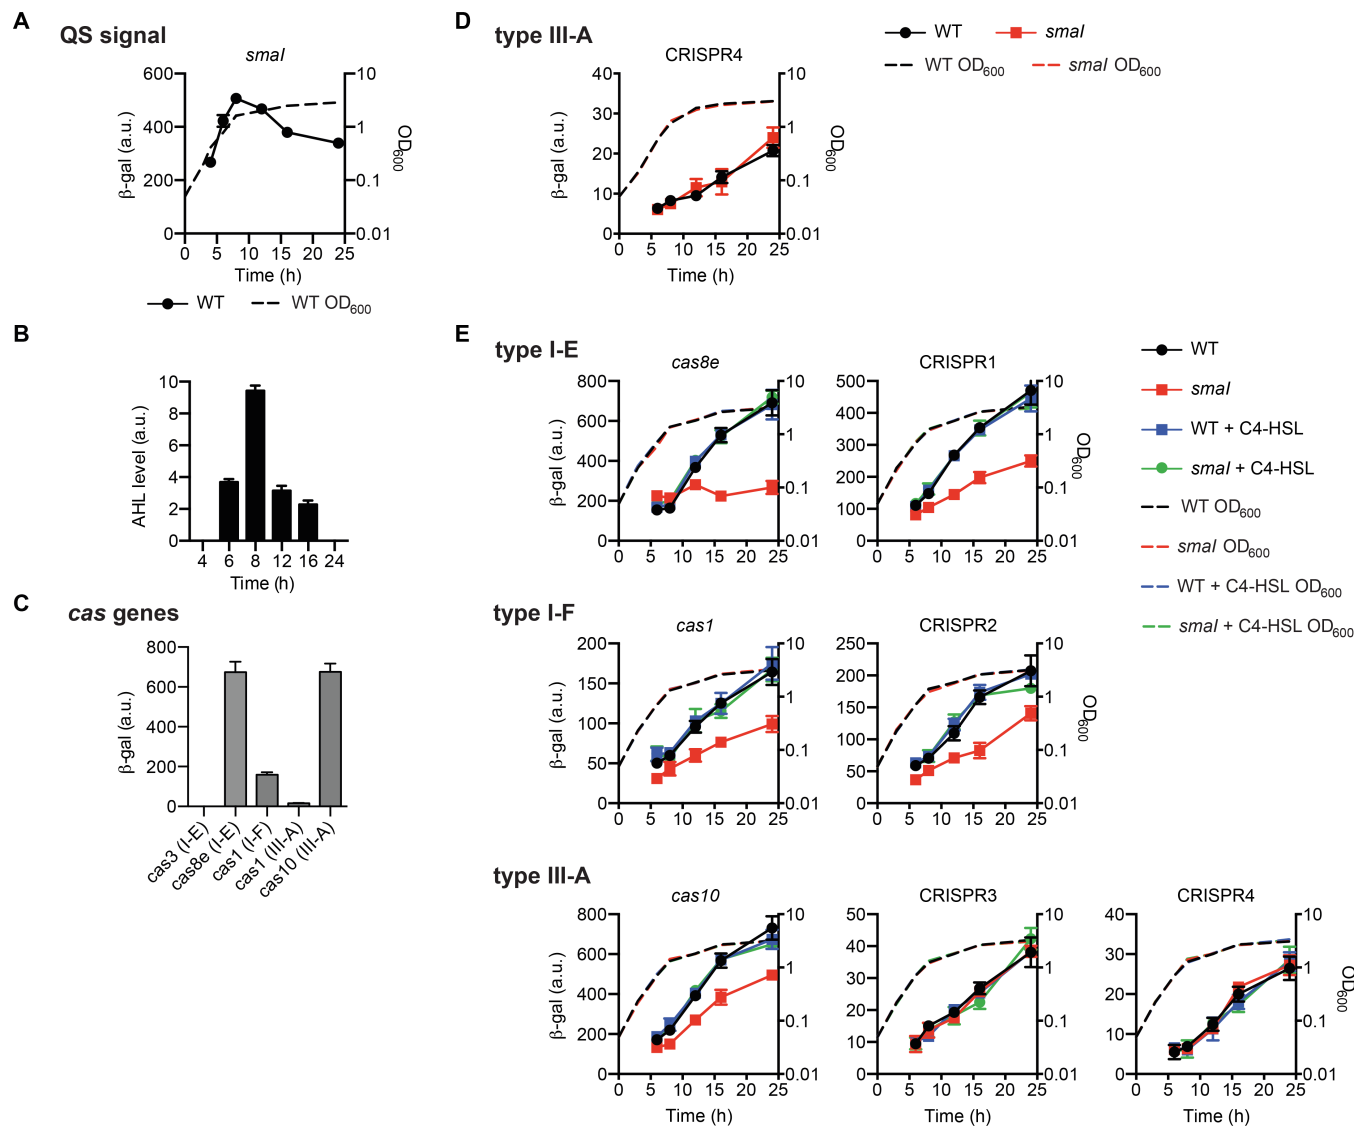

**Figure S1. Production of C4-HSL signal via SmaI is responsible for upregulation of the I-E, I-F and III-A CRISPR-Cas systems at high cell density (related to Figure 1).**

(A) Normalized *smal::lacZ* reporter activity and cell growth of strain LC13. (B) AHL levels in the supernatant of WT cultures, measured using a bioassay. (C) Activity of the *cas::lacZ* reporters for the type I-E *cas3* (strain PCF209) and *cas8e* (strain PCF210), type I-F *cas1* (strain PCF211) and type III-A *cas1* (strain PCF212) and *cas10* (strain PCF213) promoters at 24 h post inoculation in the WT background. (D) Activity of CRISPR4::*lacZ* (solid lines) and growth (dashed lines) in the WT (strain PCF217) and *smal* (strain PCF226) backgrounds. (E) Activity of *cas::lacZ* and CRISPR::*lacZ* for each of the type I-E, I-F and III-A CRISPR-Cas systems in the WT (strains PCF210, PCF211 and PCF213-PCF217) and *smal* mutant backgrounds (PCF219, PCF220 and PCF222-PCF226) throughout growth  $\pm$  0.5  $\mu$ M C4-HSL or DMSO (solvent control). Differences in activity between *smal* + DMSO and *smal* + C4-HSL beyond 12 h were statistically significant ( $P \leq 0.05$ ) for each reporter except CRISPR3 and CRISPR4 (two-way analysis of variance (ANOVA) with the Bonferroni's multiple comparisons test). Data shown are the mean  $\pm$  SD ( $n = 3$ ).

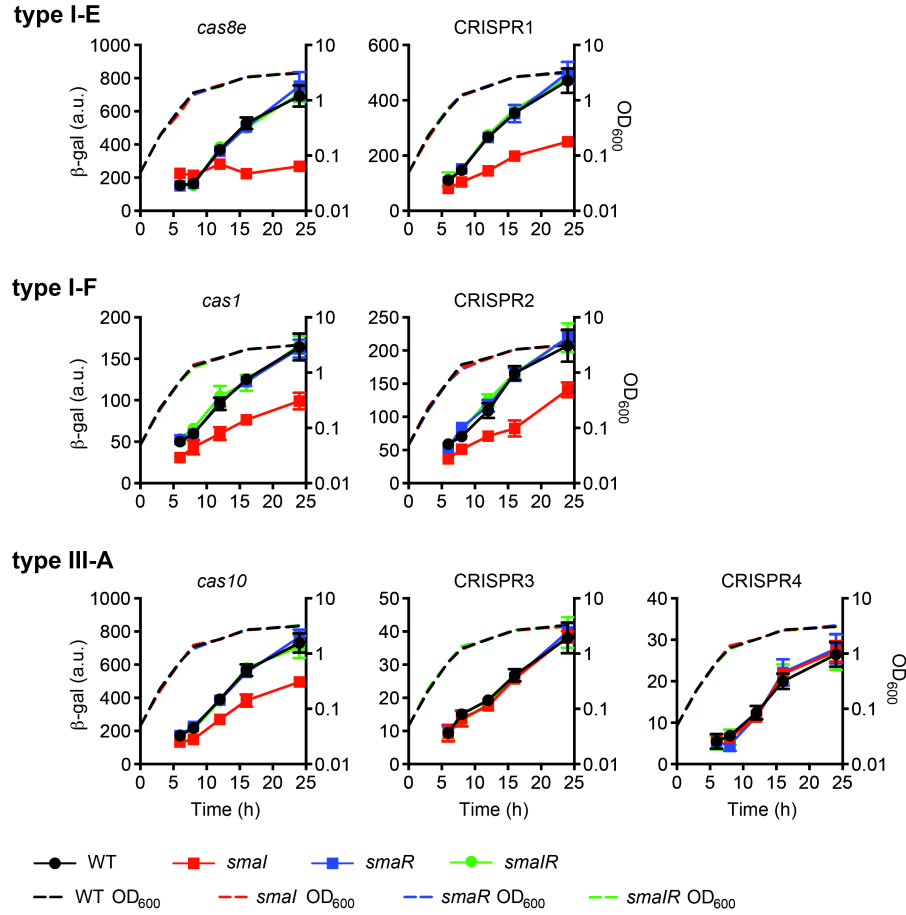

**Figure S2. SmaR represses CRISPR-Cas expression in the absence of QS signals through growth (related to Figure 2).** *cas::lacZ* and CRISPR::*lacZ* activity for each of the type I-E, type I-F and type III-A reporter strains in the WT (see Figure S1 for strain names), *smaI* mutant (see Figure S1 for strain names), *smaR* mutant (PCF228, PCF229 and PCF231-235) and *smaIR* mutant (PCF237, PCF238 and PCF240-244) backgrounds throughout growth. Differences in activity between *smaI* and all other strains beyond 12 h were statistically significant ( $P \leq 0.05$ ) for each reporter except CRISPR3 and CRISPR4 (two-way analysis of variance (ANOVA) with the Bonferroni's multiple comparisons test). Data shown are the mean  $\pm$  SD ( $n = 3$ ).

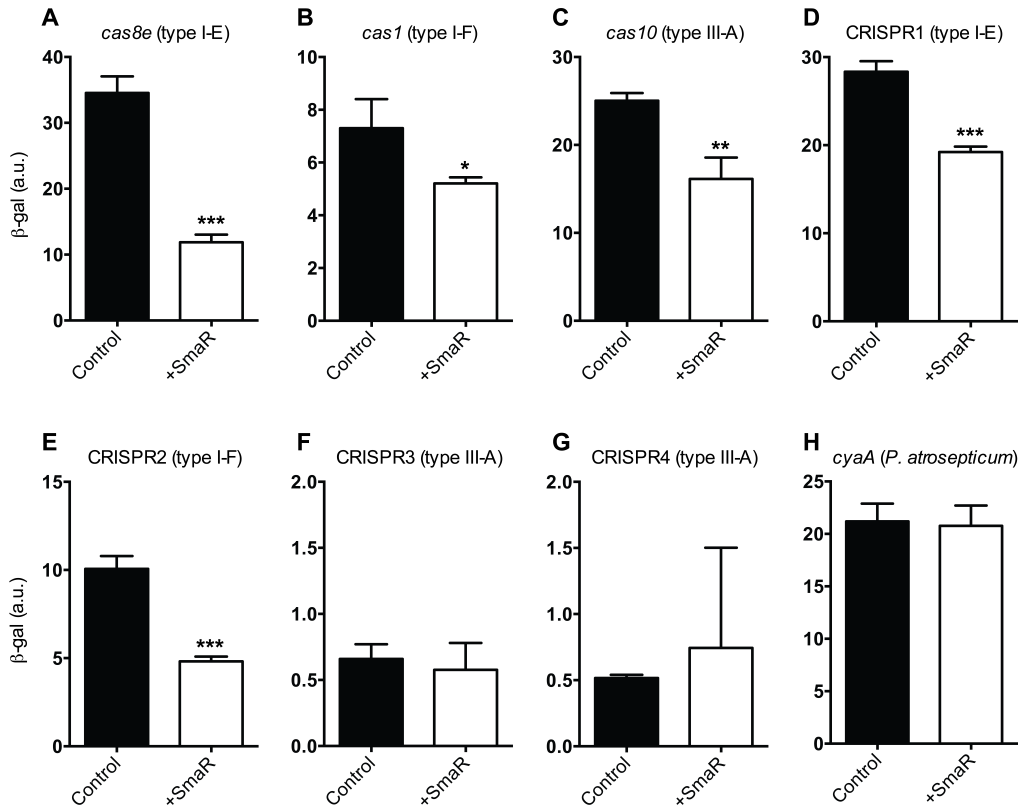

**Figure S3. SmaR represses the type I-E, I-F and III-A CRISPR-Cas systems (related to Figure 2).**

Normalized *cas::lacZ* activity in a heterologous system (*E. coli* CC118  $\lambda$ pir) for each of the (A) type I-E *cas8e* (pPF714), (B) type I-F *cas1* (pPF715), (C) type III-A *cas10* (pPF717), (D) type I-E CRISPR1 (pPF861), (E) type I-F CRISPR2 (pPF862), (F) type III-A CRISPR3 (pPF863) and (G) type III-A CRISPR4 (pPF888) promoters  $\pm$  SmaR (pPF972), at 3 h post induction with 0.1 mM IPTG. (H) Activity of a *P. atrosepticum* *cyaA::lacZ* (control) reporter in *E. coli* CC118  $\lambda$ pir  $\pm$  SmaR (pPF972), at 3 h post induction. Statistical significance was assessed by unpaired two-tailed t-test (\*  $P \leq 0.05$ , \*\*  $P \leq 0.01$ , \*\*\*  $P \leq 0.001$ ). Data shown are the mean  $\pm$  SD ( $n = 3$ ).

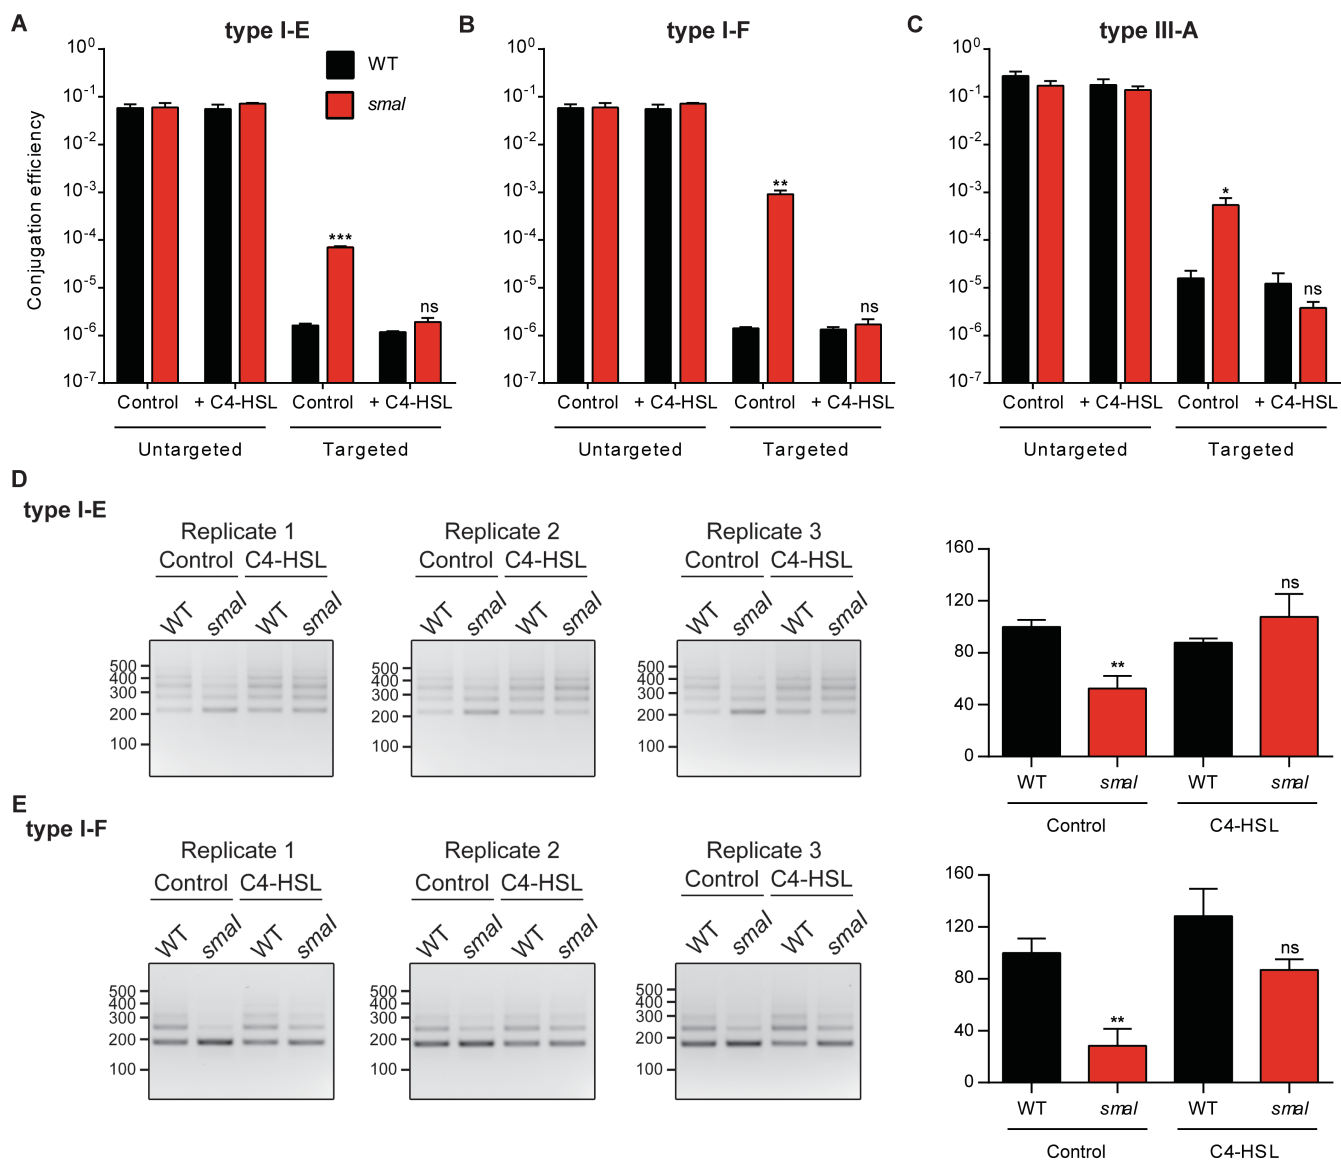

**Figure S4. Addition of C4-HSL to the *smal* mutant restores wild-type interference and adaptation for each CRISPR-Cas subtype (related to Figures 3 and 4).**

Conjugation efficiency of untargeted control and targeted plasmids for the (A) type I-E (pPF719 control and pPF724 targeted), (B) type I-F (pPF719 control and pPF722 targeted) or (C) type III-A (pPF781 control and pPF1043 targeted) systems in WT (LacA) or *smal* (LIS) mutant backgrounds. Conjugation efficiency was scored as transconjugants/recipients. Spacer acquisition (CRISPR expansion) for the WT or *smal* mutant strains for either the (D) type I-E (pPF1048 primed) or (E) type I-F (pPF1032 primed) systems. CRISPR arrays were amplified by PCR and analyzed on 3% agarose gels. CRISPR expansion was normalized relative to the expansion observed in the WT control (WT control mean set as 100%). C4-HSL was added at a final concentration of 0.5  $\mu$ M to the plates and bacterial cultures throughout the experiments and the controls included DMSO solvent. Statistical significance was assessed by unpaired t-test (\*  $P \leq 0.05$ , \*\*  $P \leq 0.01$ , \*\*\*  $P \leq 0.001$ ). Data shown are the mean  $\pm$  SD ( $n = 3$ ).

**Table S1. Bacterial strains used in this study (related to Figures 1-4).**

| Name                                  | Genotype/Phenotype                                                                                                                                                                                                                                                                                  | Reference                  |
|---------------------------------------|-----------------------------------------------------------------------------------------------------------------------------------------------------------------------------------------------------------------------------------------------------------------------------------------------------|----------------------------|
| <b><i>E. coli</i></b>                 |                                                                                                                                                                                                                                                                                                     |                            |
| CC118 $\lambda$ pir                   | <i>araD</i> , $\Delta$ ( <i>ara</i> , <i>leu</i> ), $\Delta$ <i>lacZ</i> 74, <i>phoA</i> 20, <i>galk</i> , <i>thi</i> -1, <i>rspE</i> , <i>rpoB</i> , <i>argE</i> , <i>recA</i> 1, $\lambda$ pir                                                                                                    | (Herrero et al., 1990)     |
| DH5 $\alpha$                          | F <sup>-</sup> , $\phi$ 80 $\Delta$ <i>lacZ</i> M15, $\Delta$ ( <i>lacZ</i> Y $\alpha$ - <i>argF</i> )U169, <i>endA</i> 1, <i>recA</i> 1, <i>hsdR</i> 17 ( <i>r<sub>K</sub>m<sub>K</sub></i> <sup>+</sup> ), <i>deoR</i> , <i>thi</i> -1, <i>supE</i> 44, $\lambda$ , <i>gyrA</i> 96, <i>relA</i> 1 | Gibco/BRL                  |
| S17-1 $\lambda$ pir                   | <i>recA</i> , <i>pro</i> , <i>hsdR</i> , <i>recA</i> ::RP4-2-Tc::Mu, $\lambda$ pir, Tmp <sup>R</sup> , Sp <sup>R</sup> , Sm <sup>R</sup>                                                                                                                                                            | (de Lorenzo et al., 1990)  |
| ST18                                  | S17-1 $\lambda$ pir $\Delta$ <i>hemA</i>                                                                                                                                                                                                                                                            | (Thoma and Schobert, 2009) |
| <b><i>Serratia</i> sp. ATCC 39006</b> |                                                                                                                                                                                                                                                                                                     |                            |
| LacA                                  | <i>lac</i> - mutant generated by EMS mutagenesis, denoted "wild-type (WT)"                                                                                                                                                                                                                          | (Thomson et al., 2000)     |
| ISTSO4                                | <i>smal</i> ::mini-Tn5Sm/Sp, <i>pigX</i> ::mini-Tn5 <i>lacZ</i> 1, Sm <sup>R</sup> /Sp <sup>R</sup> , Km <sup>R</sup>                                                                                                                                                                               | (Fineran et al., 2005)     |
| LC13                                  | <i>smal</i> ::mini-Tn5 <i>lacZ</i> 1, Km <sup>R</sup>                                                                                                                                                                                                                                               | (Thomson et al., 2000)     |
| LIS                                   | <i>smal</i> ::mini-Tn5Sm/Sp, Sm <sup>R</sup> /Sp <sup>R</sup>                                                                                                                                                                                                                                       | (Thomson et al., 2000)     |
| MCR2000                               | <i>smaR</i> :: <i>cat</i> , Cm <sup>R</sup>                                                                                                                                                                                                                                                         | (Slater et al., 2003)      |
| PCF208                                | <i>smal</i> ::mini-Tn5Sm/Sp, <i>smaR</i> :: <i>cat</i> , Sm <sup>R</sup> /Sp <sup>R</sup> , Cm <sup>R</sup>                                                                                                                                                                                         | This study                 |
| PCF209                                | WT type I-E <i>cas3</i> pro:: <i>lacZ</i> (pPF713 integrant), Tc <sup>R</sup>                                                                                                                                                                                                                       | This study                 |
| PCF210                                | WT type I-E <i>cas8</i> epro:: <i>lacZ</i> (pPF714 integrant), Tc <sup>R</sup>                                                                                                                                                                                                                      | This study                 |
| PCF211                                | WT type I-F <i>cas1</i> pro:: <i>lacZ</i> (pPF715 integrant), Tc <sup>R</sup>                                                                                                                                                                                                                       | This study                 |
| PCF212                                | WT type III-A <i>cas1</i> pro:: <i>lacZ</i> (pPF716 integrant), Tc <sup>R</sup>                                                                                                                                                                                                                     | This study                 |
| PCF213                                | WT type III-A <i>cas10</i> pro:: <i>lacZ</i> (pPF717 integrant), Tc <sup>R</sup>                                                                                                                                                                                                                    | This study                 |
| PCF214                                | WT type I-E CRISPR1pro:: <i>lacZ</i> (pPF861 integrant), Tc <sup>R</sup>                                                                                                                                                                                                                            | This study                 |
| PCF215                                | WT type I-F CRISPR2pro:: <i>lacZ</i> (pPF862 integrant), Tc <sup>R</sup>                                                                                                                                                                                                                            | This study                 |
| PCF216                                | WT type III-A CRISPR3pro:: <i>lacZ</i> (pPF863 integrant), Tc <sup>R</sup>                                                                                                                                                                                                                          | This study                 |
| PCF217                                | WT type III-A CRISPR4pro:: <i>lacZ</i> (pPF888 integrant), Tc <sup>R</sup>                                                                                                                                                                                                                          | This study                 |
| PCF219                                | <i>smal</i> ::mini-Tn5Sm/Sp, type I-E <i>cas8</i> epro:: <i>lacZ</i> (pPF714 integrant), Tc <sup>R</sup> , Sm <sup>R</sup> /Sp <sup>R</sup>                                                                                                                                                         | This study                 |
| PCF220                                | <i>smal</i> ::mini-Tn5Sm/Sp, type I-F <i>cas1</i> pro:: <i>lacZ</i> (pPF715 integrant), Tc <sup>R</sup> , Sm <sup>R</sup> /Sp <sup>R</sup>                                                                                                                                                          | This study                 |
| PCF222                                | <i>smal</i> ::mini-Tn5Sm/Sp, type III-A <i>cas10</i> pro:: <i>lacZ</i> (pPF717 integrant), Tc <sup>R</sup> , Sm <sup>R</sup> /Sp <sup>R</sup>                                                                                                                                                       | This study                 |
| PCF223                                | <i>smal</i> ::mini-Tn5Sm/Sp, type I-E CRISPR1pro:: <i>lacZ</i> (pPF861 integrant), Tc <sup>R</sup> , Sm <sup>R</sup> /Sp <sup>R</sup>                                                                                                                                                               | This study                 |
| PCF224                                | <i>smal</i> ::mini-Tn5Sm/Sp, type I-F CRISPR2pro:: <i>lacZ</i> (pPF862 integrant), Tc <sup>R</sup> , Sm <sup>R</sup> /Sp <sup>R</sup>                                                                                                                                                               | This study                 |
| PCF225                                | <i>smal</i> ::mini-Tn5Sm/Sp, type III-A CRISPR3pro:: <i>lacZ</i> (pPF863 integrant), Tc <sup>R</sup> , Sm <sup>R</sup> /Sp <sup>R</sup>                                                                                                                                                             | This study                 |
| PCF226                                | <i>smal</i> ::mini-Tn5Sm/Sp, type III-A CRISPR4pro:: <i>lacZ</i> (pPF888 integrant), Tc <sup>R</sup> , Sm <sup>R</sup> /Sp <sup>R</sup>                                                                                                                                                             | This study                 |
| PCF228                                | <i>smaR</i> :: <i>cat</i> , type I-E <i>cas8</i> epro:: <i>lacZ</i> (pPF714 integrant), Tc <sup>R</sup> , Cm <sup>R</sup>                                                                                                                                                                           | This study                 |
| PCF229                                | <i>smaR</i> :: <i>cat</i> , type I-F <i>cas1</i> pro:: <i>lacZ</i> (pPF715 integrant), Tc <sup>R</sup> , Cm <sup>R</sup>                                                                                                                                                                            | This study                 |
| PCF231                                | <i>smaR</i> :: <i>cat</i> , type III-A <i>cas10</i> pro:: <i>lacZ</i> (pPF717 integrant), Tc <sup>R</sup> , Cm <sup>R</sup>                                                                                                                                                                         | This study                 |
| PCF232                                | <i>smaR</i> :: <i>cat</i> , type I-E CRISPR1pro:: <i>lacZ</i> (pPF861 integrant), Tc <sup>R</sup> , Cm <sup>R</sup>                                                                                                                                                                                 | This study                 |
| PCF233                                | <i>smaR</i> :: <i>cat</i> , type I-F CRISPR2pro:: <i>lacZ</i> (pPF862 integrant), Tc <sup>R</sup> , Cm <sup>R</sup>                                                                                                                                                                                 | This study                 |
| PCF234                                | <i>smaR</i> :: <i>cat</i> , type III-A CRISPR3pro:: <i>lacZ</i> (pPF863 integrant), Tc <sup>R</sup> , Cm <sup>R</sup>                                                                                                                                                                               | This study                 |
| PCF235                                | <i>smaR</i> :: <i>cat</i> , type III-A CRISPR4pro:: <i>lacZ</i> (pPF888 integrant), Tc <sup>R</sup> , Cm <sup>R</sup>                                                                                                                                                                               | This study                 |
| PCF237                                | <i>smal</i> ::mini-Tn5Sm/Sp, <i>smaR</i> :: <i>cat</i> , type I-E <i>cas8</i> epro:: <i>lacZ</i> (pPF714 integrant), Tc <sup>R</sup> , Cm <sup>R</sup> , Sm <sup>R</sup> /Sp <sup>R</sup>                                                                                                           | This study                 |
| PCF238                                | <i>smal</i> ::mini-Tn5Sm/Sp, <i>smaR</i> :: <i>cat</i> , type I-F <i>cas1</i> pro:: <i>lacZ</i> (pPF715 integrant), Tc <sup>R</sup> , Cm <sup>R</sup> , Sm <sup>R</sup> /Sp <sup>R</sup>                                                                                                            | This study                 |
| PCF240                                | <i>smal</i> ::mini-Tn5Sm/Sp, <i>smaR</i> :: <i>cat</i> , type III-A <i>cas10</i> pro:: <i>lacZ</i> (pPF717 integrant), Tc <sup>R</sup> , Cm <sup>R</sup> , Sm <sup>R</sup> /Sp <sup>R</sup>                                                                                                         | This study                 |
| PCF241                                | <i>smal</i> ::mini-Tn5Sm/Sp, <i>smaR</i> :: <i>cat</i> , type I-E CRISPR1pro:: <i>lacZ</i> (pPF861 integrant), Tc <sup>R</sup> , Cm <sup>R</sup> , Sm <sup>R</sup> /Sp <sup>R</sup>                                                                                                                 | This study                 |
| PCF242                                | <i>smal</i> ::mini-Tn5Sm/Sp, <i>smaR</i> :: <i>cat</i> , type I-F CRISPR2pro:: <i>lacZ</i> (pPF862 integrant), Tc <sup>R</sup> , Cm <sup>R</sup> , Sm <sup>R</sup> /Sp <sup>R</sup>                                                                                                                 | This study                 |
| PCF243                                | <i>smal</i> ::mini-Tn5Sm/Sp, <i>smaR</i> :: <i>cat</i> , type III-A CRISPR3pro:: <i>lacZ</i> (pPF863 integrant), Tc <sup>R</sup> , Cm <sup>R</sup> , Sm <sup>R</sup> /Sp <sup>R</sup>                                                                                                               | This study                 |
| PCF244                                | <i>smal</i> ::mini-Tn5Sm/Sp, <i>smaR</i> :: <i>cat</i> , type III-A CRISPR4pro:: <i>lacZ</i> (pPF888 integrant), Tc <sup>R</sup> , Cm <sup>R</sup> , Sm <sup>R</sup> /Sp <sup>R</sup>                                                                                                               | This study                 |

**Table S2. Plasmids used in this study (related to Figures 1-4).**

| Name                                                            | Genotype/Phenotype                                                                                                                           | Reference                                       |
|-----------------------------------------------------------------|----------------------------------------------------------------------------------------------------------------------------------------------|-------------------------------------------------|
| <b>Priming/interference</b>                                     |                                                                                                                                              |                                                 |
| pBAD30                                                          | Arabinose inducible expression vector, Ap <sup>R</sup>                                                                                       | (Guzman et al., 1995)                           |
| pQE-80LoriT-GFP                                                 | pQE-80LoriT derivative containing GFP, Ap <sup>R</sup>                                                                                       | Josh Ramsay; unpublished (Richter et al., 2014) |
| pQE-80LoriT-mCherry                                             | pQE-80LoriT derivative containing mCherry, Ap <sup>R</sup>                                                                                   | This study                                      |
| pPF719                                                          | Unprimed/naïve control pQE-80LoriT-GFP, Tc <sup>R</sup>                                                                                      | This study                                      |
| pPF1048                                                         | Primed type I-E CRISPR1 spacer 1 (TCA PAM) pQE-80LoriT-GFP-derivative, Tc <sup>R</sup>                                                       | This study                                      |
| pPF1032                                                         | Primed type I-F CRISPR2 spacer 2 containing a single nucleotide deletion at position 23 (GA PAM) pQE-80LoriT-GFP-derivative, Tc <sup>R</sup> | This study                                      |
| pPF724                                                          | Targeted type I-E CRISPR1 spacer 1 (CTT PAM) pQE-80LoriT-GFP-derivative, Tc <sup>R</sup>                                                     | This study                                      |
| pPF722                                                          | Targeted type I-F CRISPR2 spacer 1 (GG PAM) pQE-80LoriT-GFP-derivative, Tc <sup>R</sup>                                                      | This study                                      |
| pPF781                                                          | Untargeted/naïve control for the type III-A system, pBAD30 derivative, Cm <sup>R</sup>                                                       | This study                                      |
| pPF1043                                                         | Targeted type III-A pPF781 derivative containing a protospacer complementary to CRISPR3 spacer 1, Cm <sup>R</sup>                            | This study                                      |
| <b><i>Serratia</i> sp. ATCC 39006 <i>lacZ</i> reporters</b>     |                                                                                                                                              |                                                 |
| pVIK107-Tc                                                      | pVIK107-derivative, integrative <i>lacZ</i> reporter plasmid, RP4 oriT, oriR6K, Tc <sup>R</sup>                                              | (Patterson et al., 2015)                        |
| pPF713                                                          | type I-E <i>cas3pro::lacZ</i> reporter, pVIK107-Tc-derivative, Tc <sup>R</sup>                                                               | This study                                      |
| pPF714                                                          | type I-E <i>cas8epro::lacZ</i> reporter, pVIK107-Tc-derivative, Tc <sup>R</sup>                                                              | This study                                      |
| pPF715                                                          | type I-F <i>cas1pro::lacZ</i> reporter, pVIK107-Tc-derivative, Tc <sup>R</sup>                                                               | This study                                      |
| pPF716                                                          | type III-A <i>cas1pro::lacZ</i> reporter, pVIK107-Tc-derivative, Tc <sup>R</sup>                                                             | This study                                      |
| pPF717                                                          | type III-A <i>cas10pro::lacZ</i> reporter, pVIK107-Tc-derivative, Tc <sup>R</sup>                                                            | This study                                      |
| pPF861                                                          | type I-E CRISPR1pro::lacZ reporter, pVIK107-Tc-derivative, Tc <sup>R</sup>                                                                   | This study                                      |
| pPF862                                                          | type I-F CRISPR2pro::lacZ reporter, pVIK107-Tc-derivative, Tc <sup>R</sup>                                                                   | This study                                      |
| pPF863                                                          | type III-A CRISPR3pro::lacZ reporter, pVIK107-Tc-derivative, Tc <sup>R</sup>                                                                 | This study                                      |
| pPF888                                                          | type III-A CRISPR4pro::lacZ reporter, pVIK107-Tc-derivative, Tc <sup>R</sup>                                                                 | This study                                      |
| <b><i>Pectobacterium atrosepticum</i> <i>lacZ</i> reporters</b> |                                                                                                                                              |                                                 |
| pPF1008                                                         | <i>cyaA::lacZ</i> reporter, pVIK107-Tc-derivative, Tc <sup>R</sup>                                                                           | This study                                      |
| <b>SmaR expression</b>                                          |                                                                                                                                              |                                                 |
| pQE-80LoriT                                                     | pQE-80L (Qiagen) derivative containing RP4 oriT, Ap <sup>R</sup>                                                                             | (Richter et al., 2014)                          |
| pPF972                                                          | His <sub>6</sub> -SmaR in pQE-80L-oriT, Ap <sup>R</sup>                                                                                      | This study                                      |

**Table S3. Oligonucleotides used in this study (related to Figures 1-4).**

| Name   | Sequence (5'-3')                                                       | Notes                                                             | Restriction site(s)     |
|--------|------------------------------------------------------------------------|-------------------------------------------------------------------|-------------------------|
| PF209  | TCGTCTTCACCTCGAGAAATC                                                  | F pQE-80L-oriT MCS                                                |                         |
| PF210  | GTCATTACTGGATCTATCAACAGG                                               | R pQE-80L-oriT MCS                                                |                         |
| PF565  | CATAACACTGACAGAGGATCC                                                  | type I-E CRISPR1 sequencing                                       |                         |
| PF575  | GAACCCTTCAAAAATTGTGCG                                                  | type I-F CRISPR2 sequencing                                       |                         |
| PF610  | CCTGGCAGTTCCCTACTCTC                                                   | R pBAD30 post-MCR                                                 |                         |
| PF633  | GTGGATCTGGATGGACTGC                                                    | type I-E CRISPR1 sequencing                                       |                         |
| PF1451 | GCCACCTCGACCTGAAT                                                      | Targeted/primed construct sequencing                              |                         |
| PF1615 | TTTTCCATGGGAATTGATTGGCTCCAATTC                                         | F untargeted (no protospacer)                                     | NcoI                    |
| PF1616 | TTTTCCATGGCNCCTGCAAAAATGCAGTAATATCAAGAAGTTTTAC<br>GAATTGATTGGCTCCAATTC | F type I-F CRISPR2<br><i>protospacer</i> 1 (variable <b>PAM</b> ) | NcoI                    |
| PF1617 | TTTTCCATGGANGTAAACAATTGCAGGACCAGCAAAAATCTGTGG<br>CGAATTGATTGGCTCCAATTC | F type I-E CRISPR1<br><i>protospacer</i> 1 (variable <b>PAM</b> ) | NcoI                    |
| PF1623 | TTTTCTAGAGGAATATAATTAACCTGATAATAAATG                                   | F type I-E <i>cas3</i> pro                                        | XbaI                    |
| PF1624 | TTTCTGCAGCATCGCTTATTTTAGAATAGAAC                                       | R type I-E <i>cas3</i> pro                                        | PstI                    |
| PF1625 | TTTTCTAGATTTATCGGTGCGGGAAAGC                                           | F type I-E <i>cas8</i> epro                                       | XbaI                    |
| PF1626 | TTTCTGCAGCATGGATCTATCTCCTCAGTTA                                        | R type I-E <i>cas8</i> epro                                       | PstI                    |
| PF1627 | TTTTCTAGATCGTGTGCCAAACCCCTTTTTTC                                       | F type I-F <i>cas1</i> pro                                        | XbaI                    |
| PF1628 | TTTCTGCAGCATAATATTTCTGCTATCGCG                                         | R type I-F <i>cas1</i> pro                                        | PstI                    |
| PF1629 | TTTTCTAGAATCCGCTCTCAGGGCTTTATG                                         | F type III-A <i>cas1</i> pro                                      | XbaI                    |
| PF1630 | TTTCTGCAGCATGGTATCGATGTTCACTATGAAG                                     | R type III-A <i>cas1</i> pro                                      | PstI                    |
| PF1631 | TTTTCTAGAAGTAGGTACTATTTCTTTGGTCC                                       | F type III-A <i>cas10</i> pro                                     | XbaI                    |
| PF1632 | TTTCTGCAGCATTGACATCTCCTTGTGCC                                          | R type III-A <i>cas10</i> pro                                     | PstI                    |
| PF1642 | CAGTCTAATTTGTGACG                                                      | F screening type I-E <i>cas3</i> pro                              |                         |
| PF1643 | GAGGTGATATCTTTACC                                                      | F screening type I-E <i>cas8</i> epro                             |                         |
| PF1644 | CCATTTCTAAGCTGCCTG                                                     | F screening type I-F <i>cas1</i> pro                              |                         |
| PF1645 | CCATGTTCTGATGCAGTC                                                     | F screening type III-A <i>cas1</i> pro                            |                         |
| PF1646 | CATTACAGAATCATTGTCC                                                    | F screening type III-A <i>cas10</i> pro                           |                         |
| PF1666 | CTTGACCCGGGCGCTAGCGAGTGTATACTGGCTTACTATGTTG<br>GCAC                    | F pBAD30 AraC                                                     | XmaI                    |
| PF1668 | TTTTCTAGACTGGCAACAGATTGTGGAAC                                          | F type I-E CRISPR1pro                                             | XbaI                    |
| PF1669 | TTTCTGCAGCATAGCTGTTTCCTTCTAAAAATATATACCTGTTTAAAGG                      | R type I-E CRISPR1pro                                             | PstI                    |
| PF1670 | TTTTCTAGAAAATCGTAGACTAATTATTTAATAGCG                                   | F type I-F CRISPR2pro                                             | XbaI                    |
| PF1671 | TTTCTGCAGCATAGCTGTTTCCTAGTAACATTCCACTTTAACGA<br>TTTG                   | R type I-F CRISPR2pro                                             | PstI                    |
| PF1672 | TTTTCTAGACACACAACCGGCACACTC                                            | F type III-A CRISPR3pro                                           | XbaI                    |
| PF1673 | TTTCTGCAGCATAGCTGTTTCCTAATGAAAATTTATAACCCATTG<br>TTTTTATTTG            | R type III-A CRISPR3pro                                           | PstI                    |
| PF1674 | TTTTCTAGACCCATTTCAGGCACAGATTTTG                                        | F type III-A CRISPR4pro                                           | XbaI                    |
| PF1675 | TTTCTGCAGCATAGCTGTTTCCTAATGAAAATTTATAACCCATTG<br>TTTTTGTGTTG           | R type III-A CRISPR4pro                                           | PstI                    |
| PF1698 | CTCGGTACCATGGCATGCTGCACTGGATGACCTTTTGAATGACC                           | F T4:Cm <sup>R</sup> :T7 cassette                                 | KpnI/NcoI/SphI<br>/PstI |
| PF1699 | GAGGGGTTTTTTGGGCCAGCCTCGCAGAGCAG                                       | F OriT, overlaps PF1700                                           |                         |
| PF1700 | GAGGCTGGCCCCAAAAACCCCTCAAGACCCG                                        | R T4:Cm <sup>R</sup> :T7 cassette,<br>overlaps PF1699             |                         |
| PF1701 | TTTGCCCCGGGAGCGCTTTTCCGCTGC                                            | R OriT                                                            | XmaI                    |
| PF1789 | GATCCCGGGTTTCAGGAAGGCGGCAAG                                            | F primer <i>cyaA</i> pro                                          | SmaI                    |
| PF1790 | TTTTCTAGACAAGACGTTTCGCCTGATTTATC                                       | R primer <i>cyaA</i> pro                                          | XbaI                    |
| PF1834 | GTTGGTGGTCGTGACGG                                                      | F screening type I-E<br>CRISPR1pro and sequencing                 |                         |
| PF1835 | GAATACGGCAGTGCTGGAG                                                    | F screening type I-F<br>CRISPR2pro and sequencing                 |                         |
| PF1836 | CCCAGAGGAAGACCGTC                                                      | F screening type III-A<br>CRISPR3pro                              |                         |
| PF1837 | CATCGTTCCATCATGCG                                                      | F screening type III-A<br>CRISPR4pro                              |                         |
| PF1874 | GGTCAATCAAGAATTTCAACAG                                                 | type I-E CRISPR1 sequencing                                       |                         |
| PF1875 | GGACAATACTTTTTGAGGATGAC                                                | type I-E CRISPR1 sequencing                                       |                         |
| PF1876 | GTTTAGCTACTACTCCGCGCAGC                                                | type I-F CRISPR2 sequencing                                       |                         |
| PF1887 | GTTAAGTCAGCAGGCGTTTAGTCG                                               | R type I-E CRISPR1 spacer 2                                       |                         |



**Table S3 (continued). Oligonucleotides used in this study (related to Figures 1-4).**

| Name   | Sequence (5'-3')                                                      | Notes                                                                                                                          | Restriction site(s)     |
|--------|-----------------------------------------------------------------------|--------------------------------------------------------------------------------------------------------------------------------|-------------------------|
| PF1888 | CATCTGATGCTGACGACACTG                                                 | R type I-F CRISPR2 spacer 2                                                                                                    |                         |
| PF1903 | GTTGTTCCGCGAGACTATCGAC                                                | type I-F CRISPR2 sequencing                                                                                                    |                         |
| PF1904 | CCAGGAATCACTATATCTGGCAAG                                              | type I-F CRISPR2 sequencing                                                                                                    |                         |
| PF1905 | GCACTGAATGTTTCGATATCATTAC                                             | type I-E CRISPR1 sequencing                                                                                                    |                         |
| PF1958 | CTGGGATCCGTGTCTAATTCATTCTTTAAT                                        | F <i>smaR</i>                                                                                                                  | BamHI                   |
| PF1959 | GATCTGCAGTCATTCTGCGTCAGGGAG                                           | R <i>smaR</i>                                                                                                                  | PstI                    |
| PF1989 | TAAGTTAGTGTTCTTTAACAAGCAGGA                                           | F type I-E CRISPR1 leader                                                                                                      |                         |
| PF1990 | CACGAAAATGATAATTGATGCTGAT                                             | F type I-F CRISPR2 leader                                                                                                      |                         |
| PF2034 | TTTTCCATGGNCTGGAAGCCGCCAGTGTCGTCAGATCAGATGTG<br>AATTGATTGGCTCCAATTC   | F type I-F CRISPR2<br><i>protospacer</i> 2 containing a<br>single nucleotide deletion at<br>position 23 (variable <b>PAM</b> ) | NcoI                    |
| PF2085 | TTTTCCATGGNSWTAAACAATTGCAGGACCAGCAAAATCTGTGG<br>CGAATTGATTGGCTCCAATTC | F type I-E CRISPR1<br><i>protospacer</i> (variable <b>PAM</b> )                                                                | NcoI                    |
| PF2086 | CTTGGAAGAAAAACCGACACGTAGTGTGAAAGAAATTAGGATGAG<br>CATG                 | type III-A CRISPR3<br><i>protospacer</i> 1, anneals to<br>PF2087                                                               | KpnI/SphI<br>compatible |
| PF2087 | CTCATCCTAATTTCTTTCACACTACGTGTCGGTTTTTTTCCAAGG<br>TAC                  | type III-A CRISPR3<br><i>protospacer</i> 1, anneals to<br>PF2086                                                               | KpnI/SphI<br>compatible |

Note: In the oligonucleotide sequences, protospacers are in italics and restriction sites are underlined.

## Supplemental Experimental Procedures.

### CRISPR array sequencing

The *Serratia* sp. ATCC39006 genome has previously been sequenced (Fineran et al., 2013), but gaps existed at type I-E and I-F CRISPR arrays (CRISPR1 and CRISPR2). The CRISPR1 and CRISPR2 arrays were amplified by PCR from the LacA strain using primer pairs PF565 + PF1834 and PF565 + PF1835, respectively. The products were gel extracted and sequenced by primer walking using primers PF565, PF633, PF1874, PF1875 or PF1905 for CRISPR1 and PF575, PF1835, PF1876, PF1903 or PF1904 for CRISPR2. Assembled reads were mapped to the existing genome (NZ\_AWXH000000000) using Geneious v9 (Kearse et al., 2012). The sequenced arrays were verified by aligning short (36 nt), single-end Illumina reads from the original de novo genome assembly dataset (Fineran et al., 2013). The CRISPR3 and CRISPR4 arrays were fully assembled in the existing draft sequence.

### Construction of *cas* and CRISPR reporter strains

The *cas* and CRISPR promoter regions for the type I-E, I-F and III-A systems were each cloned into an integrative *lacZ* reporter plasmid, pVIK107-Tc (Table S2). The promoter regions were amplified by PCR and cloned into pVIK107-Tc using the primers and their respective restriction endonucleases listed in Table S3. The integrative vectors were introduced into the various *Serratia* backgrounds by conjugation from the donor strain *E. coli* S17-1  $\lambda$ pir. Counter-selection for the *E. coli* donor was achieved using either growth on minimal medium or on LB containing appropriate antibiotics for the *Serratia* backgrounds. All integrant reporter strains were confirmed by appropriate antibiotic resistance, PCR and sequencing.

### Construction of *SmaR* expression plasmid and heterologous repression assays

A plasmid for heterologous expression of *SmaR* was generated by PCR amplification of the *smaR* gene using primers PF1958 and PF1959. The product was digested with BamHI and PstI and cloned into pQE-80LoriT that was cut with the same enzymes, resulting in plasmid pPF972. *E. coli* CC118  $\lambda$ pir was transformed with either the vector control (pQE-80LoriT) or the construct for *SmaR* expression (pPF972) and with either the control reporter plasmid (pVIK107-Tc) or reporter plasmids for the different *cas* and CRISPR promoter-*lacZ* fusions (Table S2). Transformants were confirmed by PCR and their antibiotic-resistance profile, and grown at 37°C for  $\beta$ -galactosidase assays as described above.

### Construction of interference and priming plasmids

Plasmids that would be targeted or primed by the type I-E and I-F systems were generated as follows. The gene encoding GFPmut3.1 was amplified from pGREENTIR and cloned into the EcoRI and HindIII sites of pQE-80LoriT, to generate pQE-80LoriT-GFP. The gene encoding Tc<sup>R</sup> and either no protospacer (PF1615), a type I-E protospacer (PF1617) or a type I-F protospacer containing a single nucleotide deletion at position 23 (PF1616 and PF2034) was amplified from pTRB31 (Richter et al., 2014) with the reverse primer PF210. Primers PF1617, PF1616 and PF2034 had a variable nucleotide in the type I-E and I-F PAM, respectively, which allowed for cloning of targeted and primed plasmids (see Table S3). The PCR products were digested with NcoI and XhoI and ligated into pQE-80L-oriT-GFP cut with BspHI (compatible with NcoI) and XhoI. Plasmids were sequenced and the resulting plasmids were pPF719 (no protospacer control), pPF724 (type I-E targeted), pPF722 (type I-F targeted), pPF1048 (type I-E primed), pPF1032 (type I-F primed), (Table S3). To construct the type III-A targeted plasmid, we cloned a protospacer complementary to the CRISPR3 spacer 1 into the multiple cloning region a pBAD30 expression vector derivative (pPF781). The pPF781 (naïve control) plasmid was constructed by joining a Cm<sup>R</sup> cassette with the RP4 OriT from pQE-80LoriT (using overlap PCR with primers PF1698 + PF1700 and PF1699 + PF1701 for the first round, followed by PF1698 + PF1701 in the second round), digesting the product with KpnI and XmaI, and subsequently ligating this with a KpnI/XmaI-digested AraC/P<sub>BAD</sub> fragment of pBAD30 (generated by PCR using the primers PF1666 + PF610). The protospacer fragment corresponding to CRISPR3 spacer 1 was formed by annealing primers PF2086 and PF2087, which resulted in overlapping sticky ends compatible with the KpnI and SphI sites in the multiple cloning region of pPF781. The resulting construct (pPF1043) encodes the III-A targeted protospacer on the sense strand of the transcript produced from the *araBAD* promoter.

## Supplemental References

- Fineran, P.C., Slater, H., Everson, L., Hughes, K., and Salmond, G.P.C. (2005). Biosynthesis of tripyrrole and beta-lactam secondary metabolites in *Serratia*: integration of quorum sensing with multiple new regulatory components in the control of prodigiosin and carbapenem antibiotic production. *Mol. Microbiol.* *56*, 1495–1517.
- Fineran, P.C., Iglesias Cans, M.C., Ramsay, J.P., Wilf, N.M., Cossyleon, D., McNeil, M.B., Williamson, N.R., Monson, R.E., Becher, S.A., Stanton, J.-A.L., et al. (2013). Draft Genome Sequence of *Serratia* sp. strain ATCC 39006, a Model Bacterium for Analysis of the Biosynthesis and Regulation of Prodigiosin, a Carbapenem, and Gas Vesicles. *Genome Announc.* *1*, e01039-13.
- Guzman, L.L.M., Belin, D., Carson, M.J., Beckwith, J., Luz-Maria Guzman Michael J. Carson, and Jon Beckwith, D.B. (1995). Tight Regulation, Modulation, and High-Level Expression by Vectors Containing the Arabinose PBAD Promoter. *J. Bacteriol.* *177*, 4121–4130.
- Herrero, M., De Lorenzo, V., and Timmis, K.N. (1990). Transposon vectors containing non-antibiotic resistance selection markers for cloning and stable chromosomal insertion of foreign genes in gram-negative bacteria. *J. Bacteriol.* *172*, 6557–6567.
- Kearse, M., Moir, R., Wilson, A., Stones-Havas, S., Cheung, M., Sturrock, S., Buxton, S., Cooper, A., Markowitz, S., Duran, C., et al. (2012). Geneious Basic: An integrated and extendable desktop software platform for the organization and analysis of sequence data. *Bioinformatics* *28*, 1647–1649.
- de Lorenzo, V., Herrero, M., Jakubzik, U., and Timmis, K.N. (1990). Mini-Tn5 transposon derivatives for insertion mutagenesis, promoter probing, and chromosomal insertion of cloned DNA in gram-negative eubacteria. *J. Bacteriol.* *172*, 6568–6572.
- Patterson, A.G., Chang, J.T., Taylor, C., and Fineran, P.C. (2015). Regulation of the Type I-F CRISPR-Cas system by CRP-cAMP and GalM controls spacer acquisition and interference. *Nucleic Acids Res.* *43*, 6038–6048.
- Richter, C., Dy, R.L., McKenzie, R.E., Watson, B.N.J., Taylor, C., Chang, J.T., McNeil, M.B., Staals, R.H.J., and Fineran, P.C. (2014). Priming in the Type I-F CRISPR-Cas system triggers strand-independent spacer acquisition, bi-directionally from the primed protospacer. *Nucleic Acids Res.* 8516–8526.
- Slater, H., Crow, M., Everson, L., and Salmond, G.P.C. (2003). Phosphate availability regulates biosynthesis of two antibiotics, prodigiosin and carbapenem, in *Serratia* via both quorum-sensing-dependent and -independent pathways. *Mol. Microbiol.* *47*, 303–320.
- Thoma, S., and Schobert, M. (2009). An improved *Escherichia coli* donor strain for diparental mating. *FEMS Microbiol. Lett.* *294*, 127–132.
- Thomson, N.R., Crow, M. a., McGowan, S.J., Cox, A., and Salmond, G.P.C. (2000). Biosynthesis of carbapenem antibiotic and prodigiosin pigment in *Serratia* is under quorum sensing control. *Mol. Microbiol.* *36*, 539–556.
